# Supplementary material for: Origin, Diversity, and Multiple Roles of Enzymes with Metallo-β-Lactamase Fold from Different Organisms
Source: MDPI journal article supplement (doi:10.3390/cells12131752), 2023-06-30
Supplement: s1 [file s1]

**Supplementary Table S2:** BlastP results of the MBL Ancestor (120 aa) against the Nanoarchaeota database (NCBI) (40 hits)

| Scientific Name             | Predicted functions                 | aa % Id | Query %cov. | E-value  | Max Score | Hit Size (aa) | MBL signature |
|-----------------------------|-------------------------------------|---------|-------------|----------|-----------|---------------|---------------|
| Nanoarchaeota archaeon      | MBL fold metallo-hydrolase          | 30,59   | 56%         | 0,032    | 33,5      | 116           | HiHpDH        |
| Nanoarchaeota archaeon      | MBL fold metallo-hydrolase          | 32,97   | 62%         | 0,01     | 35,8      | 256           | HcHyDH        |
| Nanoarchaeota archaeon      | MBL fold metallo-hydrolase          | 30,15   | 75%         | 6,00E-09 | 52,8      | 194           | HhHfDH        |
| Nanoarchaeota archaeon      | MBL fold metallo-hydrolase          | 35,82   | 75%         | 1,00E-06 | 46,6      | 193           | HiHyDH        |
| Nanoarchaeota archaeon      | MBL fold metallo-hydrolase          | 36,45   | 75%         | 2,00E-09 | 53,5      | 165           | HiHmDH        |
| Nanoarchaeota archaeon      | TPA: MBL fold metallo-hydrolase     | 37,74   | 75%         | 4,00E-13 | 61,6      | 108           | HsHyDH        |
| Nanoarchaeota archaeon      | MBL fold metallo-hydrolase          | 37,72   | 77%         | 9,00E-14 | 64,3      | 141           | HiHfDH        |
| Candidatus Tiddalikarchaeum | Metallo-beta-lactamase fold protein | 33,33   | 85%         | 5,00E-09 | 52,8      | 183           | HiHpDH        |
| Nanoarchaeota archaeon      | MBL fold metallo-hydrolase          | 37,16   | 87%         | 3,00E-13 | 63,5      | 177           | HaHfDH        |
| Nanoarchaeota archaeon      | MBL fold metallo-hydrolase          | 33,1    | 88%         | 5,00E-14 | 66,6      | 206           | HnHyDH        |
| Nanoarchaeota archaeon      | MBL fold metallo-hydrolase          | 40,32   | 88%         | 4,00E-17 | 73,6      | 162           | HnHyDH        |
| Nanoarchaeota archaeon      | MBL fold metallo-hydrolase          | 31,11   | 89%         | 6,00E-12 | 60,5      | 188           | HnHfDH        |
| Nanoarchaeota archaeon      | MBL fold metallo-hydrolase          | 32,89   | 89%         | 4,00E-10 | 55,8      | 203           | HiHfDH        |
| Nanoarchaeota archaeon      | MBL fold metallo-hydrolase          | 33,78   | 89%         | 3,00E-13 | 64,3      | 193           | HiHyDH        |
| Nanoarchaeota archaeon      | MBL fold metallo-hydrolase          | 34,01   | 89%         | 5,00E-14 | 65,9      | 182           | HsHwDH        |
| Nanoarchaeota archaeon      | MBL fold metallo-hydrolase          | 34,01   | 89%         | 7,00E-14 | 65,9      | 192           | HiHfDH        |
| Nanoarchaeota archaeon      | MBL fold metallo-hydrolase          | 28,76   | 90%         | 2,00E-11 | 58,9      | 165           | HnHfDH        |
| Nanoarchaeota archaeon      | MBL fold metallo-hydrolase          | 33,57   | 90%         | 1,00E-13 | 64,7      | 185           | HiHyDH        |
| Nanoarchaeota archaeon      | MBL fold metallo-hydrolase          | 37,23   | 91%         | 5,00E-15 | 68,2      | 162           | HfHfDH        |
| Nanoarchaeota archaeon      | MBL fold metallo-hydrolase          | 27,65   | 92%         | 6,00E-08 | 50,1      | 192           | HiHyDH        |
| Nanoarchaeota archaeon      | MBL fold metallo-hydrolase          | 32      | 92%         | 2,00E-12 | 62        | 212           | HeHtDH        |
| Nanoarchaeota archaeon      | MBL fold metallo-hydrolase          | 28,16   | 93%         | 7,00E-09 | 52,4      | 194           | HiHyDH        |
| Nanoarchaeota archaeon      | MBL fold metallo-hydrolase          | 29,07   | 93%         | 1,00E-07 | 49,3      | 192           | HfHfDH        |
| Nanoarchaeota archaeon      | MBL fold metallo-hydrolase          | 30,73   | 93%         | 4,00E-10 | 56,2      | 217           | HtHfDH        |
| Nanoarchaeota archaeon      | MBL fold metallo-hydrolase          | 33,74   | 93%         | 4,00E-13 | 63,5      | 181           | HcHfDH        |
| Nanoarchaeota archaeon      | MBL fold metallo-hydrolase          | 34,66   | 93%         | 4,00E-14 | 67        | 227           | HaHfDH        |
| Nanoarchaeota archaeon      | MBL fold metallo-hydrolase          | 35,22   | 93%         | 5,00E-11 | 58,2      | 178           | HeHfDH        |

|                        |                                  |       |      |          |      |     |        |
|------------------------|----------------------------------|-------|------|----------|------|-----|--------|
| Nanoarchaeota archaeon | MBL fold metallo-hydrolase       | 30,81 | 94%  | 6,00E-11 | 58,2 | 193 | HnHyDH |
| Nanoarchaeota archaeon | MBL fold metallo-hydrolase       | 26,82 | 99%  | 7,00E-07 | 47   | 198 | HIHyDH |
| Nanoarchaeota archaeon | hypothetical protein DRN75_01390 | 29,01 | 99%  | 5,00E-12 | 60,5 | 165 | HIHyDH |
| Nanoarchaeota archaeon | MBL fold metallo-hydrolase       | 29,94 | 99%  | 8,00E-11 | 57,8 | 189 | HIHyDH |
| Nanoarchaeota archaeon | MBL fold metallo-hydrolase       | 30,34 | 99%  | 4,00E-13 | 63,5 | 191 | HIHyDH |
| Nanoarchaeota archaeon | MBL fold metallo-hydrolase       | 31,43 | 99%  | 1,00E-11 | 60,1 | 187 | HtHfDH |
| Nanoarchaeota archaeon | MBL fold metallo-hydrolase       | 31,43 | 99%  | 1,00E-11 | 60,1 | 193 | HsHfDH |
| Nanoarchaeota archaeon | MBL fold metallo-hydrolase       | 31,43 | 99%  | 5,00E-09 | 52,8 | 184 | HcHfDH |
| Nanoarchaeota archaeon | MBL fold metallo-hydrolase       | 30,05 | 100% | 2,00E-11 | 59,3 | 185 | HsHfDH |
| Nanoarchaeota archaeon | MBL fold metallo-hydrolase       | 30,05 | 100% | 1,00E-11 | 59,7 | 187 | HcHcDH |
| Nanoarchaeota archaeon | MBL fold metallo-hydrolase       | 32,07 | 100% | 2,00E-13 | 65,1 | 209 | HIHIDH |
| Nanoarchaeota archaeon | MBL fold metallo-hydrolase       | 34,43 | 100% | 4,00E-14 | 67   | 216 | HIHfDH |
| Nanoarchaeota archaeon | MBL fold metallo-hydrolase       | 34,76 | 100% | 5,00E-14 | 65,5 | 166 | HdHwDH |
