# Supplementary material for: Origin, Diversity, and Multiple Roles of Enzymes with Metallo-β-Lactamase Fold from Different Organisms
Source: MDPI journal article supplement (doi:10.3390/cells12131752), 2023-06-30
Supplement: s1 [file s1]

**Supplementary Table S1:** BlastP result of **MBL Ancestor (120 aa)** vs Asgard group database (NCBI) (94 hits)

| Microorganism names                    | Predicted function             | aa %Id | Query % cov. | E-value  | Max Score | Hit size (aa) | Acc. Number | MBL signature |
|----------------------------------------|--------------------------------|--------|--------------|----------|-----------|---------------|-------------|---------------|
| Candidatus Lokiarchaeota archaeon      | MBL fold metallo-hydrolase     | 29,66  | 100%         | 6,00E-08 | 52        | 254           | TFF89211    | HsHvDH        |
| Candidatus Helarchaeota archaeon       | MBL fold metallo-hydrolase     | 28,98  | 100%         | 2,00E-11 | 60,8      | 206           | NVM52811    | HiHpDH        |
| Candidatus Helarchaeota archaeon       | MBL fold metallo-hydrolase     | 25     | 100%         | 3,00E-07 | 49,7      | 208           | NVM29062    | HvHpDH        |
| Candidatus Heimdallarchaeota archaeon  | MBL fold metallo-hydrolase     | 31,36  | 98%          | 2,00E-09 | 57        | 361           | UCE14378    | HtHaDH        |
| Candidatus Lokiarchaeota archaeon      | MBL fold metallo-hydrolase     | 29,67  | 96%          | 5,00E-09 | 55,1      | 268           | MCK4369556  | HeHfDH        |
| Candidatus Lokiarchaeota archaeon      | MBL fold metallo-hydrolase     | 36,3   | 95%          | 6,00E-11 | 59,7      | 200           | NHI94306    | HyHgDH        |
| Candidatus Lokiarchaeota archaeon      | MBL fold metallo-hydrolase     | 31,11  | 95%          | 5,00E-09 | 55,1      | 268           | NVM35405    | HeHfDH        |
| Candidatus Lokiarchaeota archaeon      | MBL fold metallo-hydrolase     | 30     | 95%          | 1,00E-08 | 53,9      | 268           | TET58162    | HeHfDH        |
| Candidatus Lokiarchaeota archaeon      | Zn-dependent hydrolase         | 30     | 95%          | 8,00E-09 | 54,7      | 268           | TKJ21421    | HeHfDH        |
| Candidatus Lokiarchaeota archaeon      | Zn-dependent hydrolase         | 27,72  | 95%          | 1,00E-06 | 48,1      | 219           | TXT61116    | HnHiDH        |
| Candidatus Heimdallarchaeota archaeon  | MBL fold metallo-hydrolase     | 33,15  | 94%          | 3,00E-14 | 68,6      | 210           | MCG3216308  | HiHfDH        |
| Candidatus Heimdallarchaeota archaeon  | MBL fold metallo-hydrolase     | 32,2   | 94%          | 2,00E-14 | 68,9      | 213           | MCG3227015  | HiHfDH        |
| Asgard group archaeon                  | MBL fold metallo-hydrolase     | 31,07  | 94%          | 1,00E-12 | 64,3      | 212           | NPD89532    | HiHfDH        |
| Candidatus Heimdallarchaeota archaeon  | MBL fold metallo-hydrolase     | 30,9   | 94%          | 5,00E-13 | 65,5      | 213           | MCE7738545  | HiHfDH        |
| Candidatus Heimdallarchaeota archaeon  | MBL fold metallo-hydrolase     | 30,9   | 94%          | 1,00E-13 | 67        | 213           | MCG3258853  | HiHfDH        |
| Candidatus Heimdallarchaeota archaeon  | MBL fold metallo-hydrolase     | 28,89  | 94%          | 2,00E-09 | 55,8      | 207           | UJG41838    | HgHfDH        |
| Candidatus Heimdallarchaeota archaeon  | MBL fold metallo-hydrolase     | 28,65  | 94%          | 1,00E-09 | 56,6      | 214           | MBY9000866  | HiHfDH        |
| Candidatus Heimdallarchaeota archaeon  | MBL fold metallo-hydrolase     | 28,65  | 94%          | 5,00E-12 | 62,8      | 213           | MCE7749362  | HiHfDH        |
| Candidatus Heimdallarchaeota archaeon  | MBL fold metallo-hydrolase     | 28,25  | 94%          | 8,00E-12 | 62,4      | 212           | MCG3222392  | HiHfDH        |
| Candidatus Heimdallarchaeota archaeon  | MBL fold metallo-hydrolase     | 28,09  | 94%          | 3,00E-13 | 65,9      | 201           | MCK4896778  | HiHfDH        |
| Candidatus Lokiarchaeota archaeon      | MBL fold metallo-hydrolase     | 33,73  | 93%          | 1,00E-08 | 53,5      | 198           | MBD3352654  | HgHpDH        |
| Candidatus Lokiarchaeota archaeon      | MBL fold metallo-hydrolase     | 33,33  | 93%          | 5,00E-11 | 60,1      | 204           | NHI94307    | HiHpDH        |
| Candidatus Lokiarchaeota archaeon      | MBL fold metallo-hydrolase     | 32,93  | 93%          | 1,00E-09 | 56,2      | 198           | MBY9013814  | HgHsDH        |
| Candidatus Lokiarchaeota archaeon CR_4 | metallo-beta-lactamase protein | 32,93  | 93%          | 4,00E-10 | 57,4      | 202           | OLS12684    | HgHpDH        |
| Candidatus Helarchaeota archaeon       | MBL fold metallo-hydrolase     | 32,72  | 93%          | 7,00E-13 | 65,1      | 208           | NVM00699    | HnHpDH        |
| Candidatus Thorarchaeota archaeon      | MBL fold metallo-hydrolase     | 31,49  | 93%          | 1,00E-11 | 62        | 211           | NIU85394    | HgHfDH        |
| Candidatus Lokiarchaeota archaeon      | MBL fold metallo-hydrolase     | 30,6   | 93%          | 4,00E-06 | 47        | 269           | MCK4381340  | HcHfDH        |

|                                       |                                  |       |     |          |      |     |            |        |
|---------------------------------------|----------------------------------|-------|-----|----------|------|-----|------------|--------|
| Candidatus Lokiarchaeota archaeon     | MBL fold metallo-hydrolase       | 29,57 | 93% | 9,00E-08 | 51,6 | 269 | TFG28442   | HcHwDH |
| Candidatus Lokiarchaeota archaeon     | MBL fold metallo-hydrolase       | 28,57 | 93% | 1,00E-06 | 48,1 | 220 | MBY9011505 | HIHiDH |
| Candidatus Thorarchaeota archaeon     | MBL fold metallo-hydrolase       | 28,42 | 93% | 8,00E-07 | 48,9 | 228 | TFG04376   | HsHiDH |
| Candidatus Lokiarchaeota archaeon     | MBL fold metallo-hydrolase       | 28,02 | 93% | 4,00E-06 | 47   | 220 | MBY8980847 | HfHiDH |
| Candidatus Lokiarchaeota archaeon     | MBL fold metallo-hydrolase       | 27,98 | 93% | 2,00E-08 | 53,1 | 216 | TFG05538   | HiHpDH |
| Candidatus Heimdallarchaeota archaeon | MBL fold metallo-hydrolase       | 27,93 | 93% | 3,00E-08 | 52,8 | 207 | UJG44655   | HgHfDH |
| Candidatus Lokiarchaeota archaeon     | MBL fold metallo-hydrolase       | 27,87 | 93% | 2,00E-06 | 47,4 | 220 | MBY9021610 | HfHiDH |
| Candidatus Lokiarchaeota archaeon     | MBL fold metallo-hydrolase       | 25,97 | 93% | 9,00E-07 | 48,5 | 215 | MBY8984334 | HfHiDH |
| Candidatus Lokiarchaeota archaeon     | MBL fold metallo-hydrolase       | 28,42 | 92% | 3,00E-06 | 47,4 | 268 | TFF63840   | HfHwDH |
| Candidatus Heimdallarchaeota archaeon | MBL fold metallo-hydrolase       | 27,81 | 92% | 2,00E-07 | 50,4 | 232 | MCK5343769 | HgHiDH |
| Candidatus Heimdallarchaeota archaeon | hypothetical protein             | 27,81 | 92% | 1,00E-07 | 51,2 | 232 | PWI49420   | HgHiDH |
| Candidatus Heimdallarchaeota archaeon | MBL fold metallo-hydrolase       | 34,44 | 88% | 8,00E-16 | 73,6 | 272 | MCG3218260 | HsHfDH |
| Candidatus Heimdallarchaeota archaeon | MBL fold metallo-hydrolase       | 30,77 | 88% | 2,00E-06 | 48,1 | 282 | MCK5047437 | HsHyDH |
| Asgard group archaeon                 | MBL fold metallo-hydrolase       | 30,22 | 88% | 4,00E-06 | 47   | 279 | NPE08543   | HsHyDH |
| Candidatus Heimdallarchaeota archaeon | MBL fold metallo-hydrolase       | 28,57 | 88% | 2,00E-06 | 48,1 | 279 | MCE7746212 | HtHyDH |
| Candidatus Thorarchaeota archaeon     | hypothetical protein             | 28,16 | 88% | 5,00E-07 | 49,3 | 227 | KXH71551   | HsHiDH |
| Candidatus Thorarchaeota archaeon     | MBL fold metallo-hydrolase       | 28,38 | 87% | 7,00E-09 | 54,3 | 201 | RLI51705   | HhHsDH |
| Lokiarchaeum sp. GC14_75              | Hydroxyacylglutathione hydrolase | 28,79 | 86% | 2,00E-06 | 48,1 | 469 | KKK44737   | HeHpDH |
| Candidatus Heimdallarchaeota archaeon | MBL fold metallo-hydrolase       | 31,39 | 85% | 2,00E-08 | 53,9 | 361 | UCG03848   | HtHaDH |
| Candidatus Helarchaeota archaeon      | MBL fold metallo-hydrolase       | 30,97 | 85% | 3,00E-07 | 50,1 | 331 | NVM27601   | HsHiDH |
| Candidatus Lokiarchaeota archaeon     | MBL fold metallo-hydrolase       | 29,76 | 85% | 5,00E-10 | 57,4 | 220 | TFG15931   | HfHiDH |
| Candidatus Lokiarchaeota archaeon     | MBL fold metallo-hydrolase       | 28,67 | 85% | 7,00E-07 | 49,3 | 276 | MBY9020760 | HeHfDH |
| Candidatus Lokiarchaeota archaeon     | MBL fold metallo-hydrolase       | 29,61 | 83% | 8,00E-07 | 49,3 | 362 | MBN1800984 | HeHfDH |
| Candidatus Lokiarchaeota archaeon     | MBL fold metallo-hydrolase       | 28,57 | 83% | 8,00E-07 | 48,9 | 276 | MBY9009056 | HeHfDH |
| Candidatus Odinarchaeota archaeon     | putative metallo-hydrolase       | 34,21 | 81% | 4,00E-11 | 60,5 | 220 | OLS17334   | HvHfDH |
| Candidatus Lokiarchaeota archaeon     | MBL fold metallo-hydrolase       | 31,39 | 81% | 8,00E-09 | 53,9 | 210 | MBD3226603 | HkHpDH |
| Candidatus Thorarchaeota archaeon     | MBL fold metallo-hydrolase       | 35,94 | 77% | 4,00E-11 | 61,2 | 301 | NIU82202   | HtHgDH |
| Candidatus Lokiarchaeota archaeon     | MBL fold metallo-hydrolase       | 33,08 | 75% | 2,00E-09 | 55,8 | 210 | TFF86283   | HkHpDH |
| Candidatus Heimdallarchaeota          | Beta-lactamase hydrolase-like    | 32,52 | 75% | 4,00E-06 | 46,2 | 169 | OLS32805   | HsHaDH |
| Asgard group archaeon                 | MBL fold metallo-hydrolase       | 31,71 | 75% | 2,00E-06 | 47,8 | 219 | NPD89726   | HsHaDH |

|                                       |                                  |       |     |          |      |     |            |        |
|---------------------------------------|----------------------------------|-------|-----|----------|------|-----|------------|--------|
| Candidatus Heimdallarchaeota archaeon | MBL fold metallo-hydrolase       | 28,37 | 75% | 8,00E-11 | 58,5 | 162 | MCK5140869 | HIHfDH |
| Candidatus Heimdallarchaeota archaeon | MBL fold metallo-hydrolase       | 28,37 | 75% | 8,00E-11 | 58,9 | 163 | MCK5304619 | HIHfDH |
| Candidatus Heimdallarchaeota archaeon | MBL fold metallo-hydrolase       | 27,66 | 75% | 1,00E-11 | 60,5 | 162 | MCK4971958 | HIHfDH |
| Candidatus Lokiarchaeota archaeon     | MBL fold metallo-hydrolase       | 27,05 | 73% | 3,00E-06 | 47,4 | 366 | NMC07444   | HtHaDH |
| Candidatus Lokiarchaeota archaeon     | MBL fold metallo-hydrolase       | 42,17 | 59% | 8,00E-08 | 52   | 349 | MCK5588320 | HsHaDH |
| Candidatus Helarchaeota archaeon      | MBL fold metallo-hydrolase       | 42,67 | 58% | 2,00E-13 | 67,4 | 297 | NVM29969   | HfHIDH |
| Candidatus Lokiarchaeota archaeon     | MBL fold metallo-hydrolase       | 39,76 | 58% | 5,00E-09 | 55,1 | 308 | NHI94917   | HwHvDH |
| Candidatus Thorarchaeota archaeon     | MBL fold metallo-hydrolase       | 34,15 | 58% | 4,00E-06 | 47   | 303 | UCH04213   | HiHpDH |
| Candidatus Lokiarchaeota archaeon     | MBL fold metallo-hydrolase       | 42,11 | 57% | 8,00E-10 | 57,4 | 323 | TFF90670   | HsHhDH |
| Lokiarchaeum sp. GC14_75              | N-acyl homoserine lactonase      | 41,89 | 57% | 4,00E-11 | 60,8 | 293 | KKK46137   | HfHaDH |
| Candidatus Helarchaeota archaeon      | MBL fold metallo-hydrolase       | 46,25 | 56% | 1,00E-10 | 58,9 | 207 | NVM04758   | HgHiDH |
| Lokiarchaeum sp. GC14_75              | N-acyl homoserine lactonase      | 45,21 | 56% | 1,00E-12 | 65,5 | 293 | KKK40112   | HfHvDH |
| Asgard group archaeon                 | MBL fold metallo-hydrolase       | 43,21 | 56% | 4,00E-08 | 52,4 | 220 | NHJ49411   | HcHvDH |
| Candidatus Lokiarchaeota archaeon     | MBL fold metallo-hydrolase       | 40,54 | 56% | 1,00E-09 | 57   | 294 | MBY8985829 | HfHaDH |
| Candidatus Helarchaeota archaeon      | MBL fold metallo-hydrolase       | 45,95 | 55% | 4,00E-12 | 63,9 | 325 | NVM03697   | HsHvDH |
| Candidatus Lokiarchaeota archaeon     | MBL fold metallo-hydrolase       | 44,3  | 55% | 2,00E-09 | 55,5 | 206 | MBD3340311 | HgHvDH |
| Candidatus Lokiarchaeota archaeon     | MBL fold metallo-hydrolase       | 43,24 | 55% | 5,00E-07 | 49,7 | 323 | MBD3227789 | HsHhDH |
| Candidatus Helarchaeota archaeon      | MBL fold metallo-hydrolase       | 43,21 | 55% | 1,00E-08 | 53,9 | 244 | NVM01246   | HyHiDH |
| Candidatus Heimdallarchaeota archaeon | MBL fold metallo-hydrolase       | 42,5  | 55% | 2,00E-07 | 50,8 | 250 | TET76246   | HgHvDH |
| Candidatus Lokiarchaeota archaeon     | MBL fold metallo-hydrolase       | 41,89 | 55% | 9,00E-07 | 48,9 | 328 | NHI93006   | HsHIDH |
| Candidatus Lokiarchaeota archaeon     | MBL fold metallo-hydrolase       | 41,25 | 55% | 3,00E-06 | 47,4 | 252 | MBD3230696 | HcHvDH |
| Candidatus Lokiarchaeota archaeon     | MBL fold metallo-hydrolase       | 38,46 | 55% | 2,00E-06 | 47,8 | 258 | MBD3230458 | HfHIDH |
| Candidatus Lokiarchaeota archaeon     | MBL fold metallo-hydrolase       | 38,46 | 55% | 2,00E-06 | 47,8 | 274 | MBY9003930 | HeHfDH |
| Candidatus Helarchaeota archaeon      | MBL fold metallo-hydrolase       | 37,8  | 55% | 1,00E-08 | 53,9 | 288 | NVM56090   | HIHrDH |
| Candidatus Lokiarchaeota archaeon     | MBL fold metallo-hydrolase       | 37,18 | 55% | 8,00E-07 | 48,9 | 277 | NHJ21661   | HeHfDH |
| Candidatus Lokiarchaeota archaeon     | Hydroxyacylglutathione hydrolase | 35,79 | 55% | 8,00E-07 | 49,3 | 347 | TXT65392   | HnHIDH |
| Candidatus Lokiarchaeota archaeon     | MBL fold metallo-hydrolase       | 35,56 | 55% | 2,00E-06 | 48,1 | 340 | TFG18023   | HiHiDH |
| Candidatus Lokiarchaeota archaeon     | MBL fold metallo-hydrolase       | 35,56 | 55% | 7,00E-07 | 49,3 | 341 | TFG25937   | HiHtDH |
| Candidatus Lokiarchaeota archaeon     | MBL fold metallo-hydrolase       | 35,56 | 55% | 1,00E-06 | 48,9 | 340 | UCC20058   | HiHtDH |
| Candidatus Lokiarchaeota archaeon     | MBL fold metallo-hydrolase       | 34,44 | 55% | 1,00E-06 | 48,5 | 340 | NVM38173   | HIHtDH |

|                                       |                            |       |     |          |      |     |            |        |
|---------------------------------------|----------------------------|-------|-----|----------|------|-----|------------|--------|
| Candidatus Lokiarchaeota archaeon     | MBL fold metallo-hydrolase | 33,33 | 55% | 2,00E-06 | 47,8 | 340 | NVM17664   | HnHiDH |
| Candidatus Lokiarchaeota archaeon     | MBL fold metallo-hydrolase | 36,11 | 53% | 2,00E-06 | 48,1 | 276 | TFG20974   | HeHfDH |
| Candidatus Lokiarchaeota archaeon     | MBL fold metallo-hydrolase | 37,93 | 52% | 1,00E-07 | 51,2 | 343 | TFG01099   | HnHmDH |
| Candidatus Lokiarchaeota archaeon     | MBL fold metallo-hydrolase | 41,18 | 50% | 5,00E-07 | 49,3 | 223 | MBN1214050 | HcHiDH |
| Candidatus Heimdallarchaeota archaeon | hypothetical protein       | 43,66 | 49% | 1,00E-06 | 48,9 | 273 | MBS85310   | HnHfDH |
| Candidatus Lokiarchaeota archaeon     | MBL fold metallo-hydrolase | 42,42 | 49% | 2,00E-07 | 50,8 | 332 | TFG05878   | HsHiDH |
| Candidatus Lokiarchaeota archaeon     | MBL fold metallo-hydrolase | 44,12 | 48% | 5,00E-07 | 49,7 | 344 | MBD3339864 | HgHpDH |
